# Supplementary material for: DFT Calculations of 31P NMR Chemical Shifts in Palladium Complexes
Source: MDPI journal article supplement (doi:10.3390/molecules27092668), 2022-04-21
Supplement: s1 [file s1]

# Supplementary Information for:

## DFT Calculations of $^{31}\text{P}$ NMR Chemical Shifts in Palladium Complexes

*Svetlana A. Kondrashova, Fedor M. Polyancev, Shamil K. Latypov\**

Arbuzov Institute of Organic and Physical Chemistry, FRC Kazan Scientific Center of RAS,  
Kazan, Tatarstan 420088, Russian Federation

|                                                                                                                                                                                                                                                                                                                                                                                                                                                                                      |    |
|--------------------------------------------------------------------------------------------------------------------------------------------------------------------------------------------------------------------------------------------------------------------------------------------------------------------------------------------------------------------------------------------------------------------------------------------------------------------------------------|----|
| <b>CALCULATIONAL DETAILS</b> .....                                                                                                                                                                                                                                                                                                                                                                                                                                                   | 3  |
| <b>Figure S1.</b> Complexes based on $\sigma$ -donor ligands.....                                                                                                                                                                                                                                                                                                                                                                                                                    | 4  |
| <b>Figure S2.</b> Charged complexes based on $\sigma$ -donor ligands. ....                                                                                                                                                                                                                                                                                                                                                                                                           | 4  |
| <b>Figure S3.</b> Complexes containing P=O groups. ....                                                                                                                                                                                                                                                                                                                                                                                                                              | 5  |
| <b>Figure S4.</b> Complexes based on $\pi$ -donating ligands. ....                                                                                                                                                                                                                                                                                                                                                                                                                   | 5  |
| <b>Table S1.</b> Experimental and calculated $^{31}\text{P}$ NMR shifts (ppm) for all model complexes. ....                                                                                                                                                                                                                                                                                                                                                                          | 6  |
| <b>Table S2.</b> Empirical scaling factors obtained by the linear regression analysis of calculated and experimental $\delta^{31}\text{P}$ for the title Pd-complexes. ....                                                                                                                                                                                                                                                                                                          | 9  |
| <b>Table S3.</b> Triplet-singlet states energy gap (UPBE0/6-31+G(d)) for the "training" set of Pd complexes ( <b>2, 9, 17, 22-23, 26, 28-30, 32, 38</b> ). ....                                                                                                                                                                                                                                                                                                                      | 10 |
| <b>Table S4.</b> Experimental and calculated (by different combinations) $^{31}\text{P}$ NMR shifts (ppm) for the "training" set of Pd complexes ( <b>2, 9, 17, 22-23, 26, 28-30, 32, 38</b> ). ....                                                                                                                                                                                                                                                                                 | 11 |
| <b>Figure S5.</b> Correlation of calculated (PBE0/{def2-TZVP; Pd(SDD)}/{PBE0/{6-311+G(2d); Pd(SDD)}}, scaled) vs experimental $^{31}\text{P}$ CSs for palladium complexes <b>1-39</b> . Complexes based on $\sigma$ -donor ligands (●), charged palladium complexes based on $\sigma$ -donor ligands (●), complexes containing P=O groups (● are the P = O phosphorus, ● are other phosphorus atoms in this type of complexes) and complexes based on $\pi$ -donor ligands (●). .... | 13 |
| <b>REFERENCES</b> .....                                                                                                                                                                                                                                                                                                                                                                                                                                                              | 14 |

## CALCULATIONAL DETAILS

The quantum chemical calculations have been carried out within the framework of the Kohn Sham density functional theory [1] with the Gaussian 03 [2] (Revision B.04) and the Gaussian 16 [3] (Revision A.03) software packages by using PBE0 [4] functional and a number of families of basis sets (Pople's [5-12], Ahlrichs's [13-15], Dunning's [16-17], Jensen's [18-20]). For the Pd center was used the quasi-relativistic Stuttgart-Dresden ECP28MWB with corresponding (8*s*7*p*6*d*)/[6*s*5*p*3*d*] GTO valence basis set [21] (denoted as "(SDD)"), Sapporo-ro-DKH3-DZP-diffuse [deprecated] basis set [22-23] and def2-TZVPD basis set [24-25]. Wherever possible, geometry optimization was started from X-ray structure. For most of the complexes the calculations were carried out for all possible conformers/isomers and results for the lowest energy forms were used in analysis. To take into account the medium effects, calculations were also carried out in the framework of Polarizable Continuum Model [26] (denoted as "PCM") with chloroform as solvent. To determine the energies of triplet states geometry optimizations were performed at the spin-unrestricted formalism (UPBE0/6-31+G(d)). <sup>31</sup>P NMR CSs were calculated by the GIAO method [27]. All <sup>31</sup>P data was referenced to H<sub>3</sub>PO<sub>4</sub>.

The pc-2, def2-TZVP, def2-TZVPD and Sapporo-DKH3-DZP-diffuse basis sets were downloaded from the EMSL basis set library for Gaussian package [28].

The Gaussian 03 calculations were carried out on a PC with IntelCore i7-3970X CPU, 3.5 GHz. Calculations with 6-311+G(3df), pc-2, cc-pVTZ, def2-TZVP, and Sapporo-ro-DKH3-DZP-diffuse [deprecated] basis sets were carried out with the Gaussian 16 on 20 CPUs, IntelXeon ES-2650 2.20 GHz.

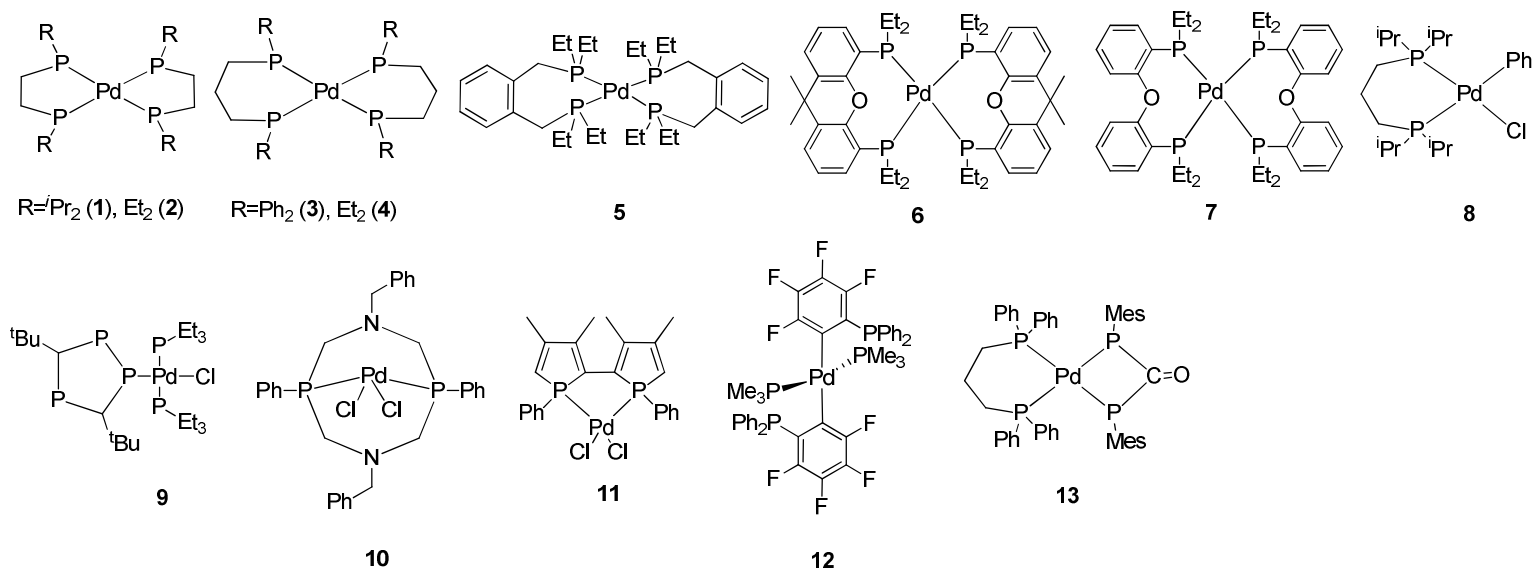

**Figure S1.** Complexes based on  $\sigma$ -donor ligands.

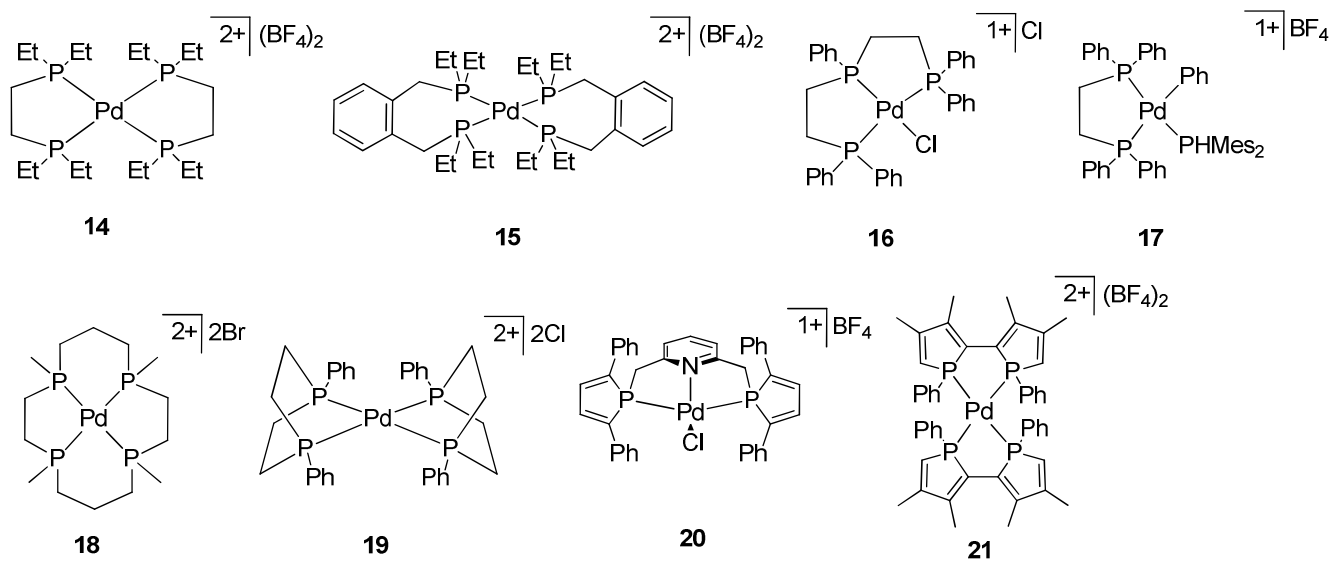

**Figure S2.** Charged complexes based on  $\sigma$ -donor ligands.

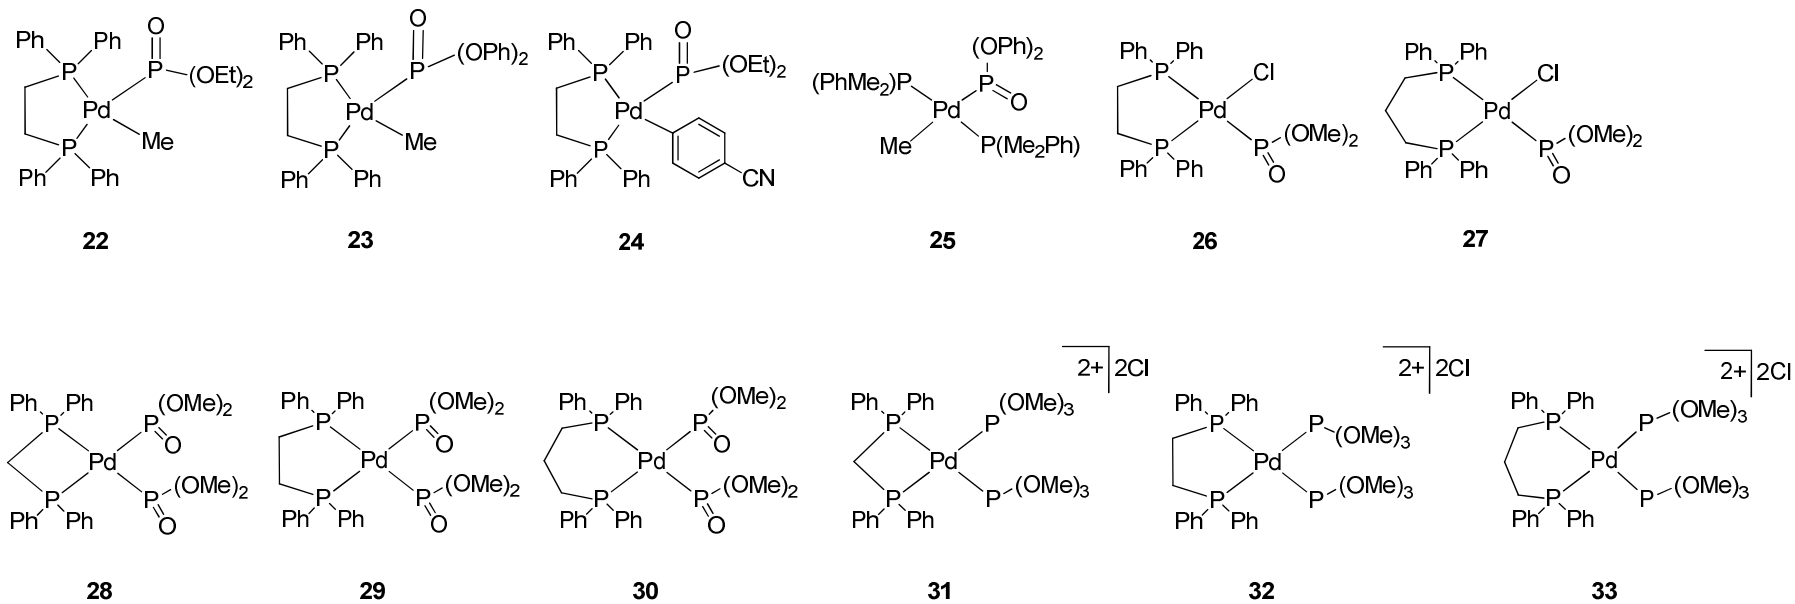

**Figure S3.** Complexes containing P=O groups.

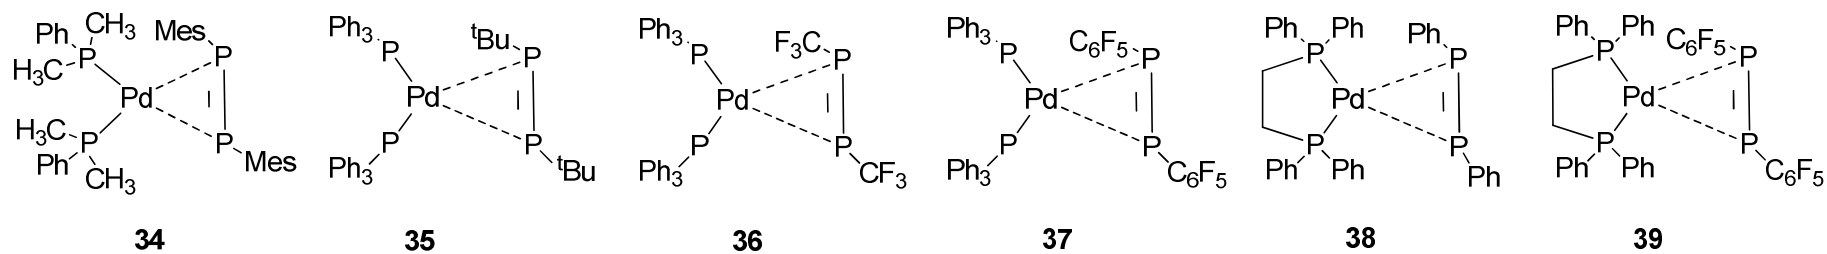

**Figure S4.** Complexes based on  $\pi$ -donating ligands.

**Table S1.** Experimental and calculated <sup>31</sup>P NMR shifts (ppm) for all model complexes.

|          |            | Calculated                             |                                                     |                                                    |                                                                 |                                          |                                                       |                                      |                                                     |           |
|----------|------------|----------------------------------------|-----------------------------------------------------|----------------------------------------------------|-----------------------------------------------------------------|------------------------------------------|-------------------------------------------------------|--------------------------------------|-----------------------------------------------------|-----------|
| Compound | Experiment | PBE0/6-311G(2d,2p)//<br>PBE0/6-31+G(d) | PBE0/6-311G(2d,2p)//<br>PBE0/6-31+G(d) <sup>a</sup> | PBE0/6-311G(2d,2p) (PCM)//<br>PBE0/6-31+G(d) (PCM) | PBE0/6-311G(2d,2p) (PCM)//<br>PBE0/6-31+G(d) (PCM) <sup>a</sup> | PBE0/6-311G(2d,2p)//<br>PBE0/6-311+G(2d) | PBE0/6-311G(2d,2p)//<br>PBE0/6-311+G(2d) <sup>a</sup> | PBE0/def2-TZVP//<br>PBE0/6-311+G(2d) | PBE0/ def2-TZVP //<br>PBE0/6-311+G(2d) <sup>a</sup> | Reference |
| 1        | 45.5       | 22.5                                   | 29.6                                                | 29.7                                               | 33.9                                                            | 27.1                                     | 36.1                                                  | 43.7                                 | 38.1                                                | 29        |
| 2        | 31.5       | 15.0                                   | 23.2                                                | 14.2                                               | 20.8                                                            | 12.0                                     | 22.8                                                  | 28.1                                 | 24.2                                                | 30        |
| 3        | 3.7        | -2.0                                   | 8.8                                                 | -3.0                                               | 6.4                                                             | -0.1                                     | 12.2                                                  | 12.3                                 | 10.1                                                | 29        |
| 4        | -2.6       | -14.0                                  | -1.4                                                | -14.2                                              | -3.1                                                            | -13.3                                    | 0.5                                                   | -2.2                                 | -2.8                                                | 30        |
| 5        | 1.3        | -17.6                                  | -4.5                                                | -14.4                                              | -3.2                                                            | -17.5                                    | -3.2                                                  | -1.4                                 | -2.1                                                | 30        |
|          | -0.4       | -18.1                                  | -4.9                                                | -21.5                                              | -9.2                                                            | -24.5                                    | -9.3                                                  | -9.0                                 | -8.8                                                |           |
| 6        | -0.9       | -19.1                                  | -5.8                                                | -18.6                                              | -6.8                                                            | -21.9                                    | -7.1                                                  | -5.6                                 | -5.8                                                | 30        |
|          | -9.9       | -27.6                                  | -13.0                                               | -27.3                                              | -14.1                                                           | -30.7                                    | -14.8                                                 | -13.1                                | -12.5                                               |           |
| 7        | -1.3       | -20.1                                  | -6.6                                                | -19.1                                              | -7.2                                                            | -23.3                                    | -8.3                                                  | -8.4                                 | -8.3                                                | 30        |
| 8        | 11.2       | -6.3                                   | 5.1                                                 | -3.2                                               | 6.2                                                             | -4.4                                     | 8.4                                                   | 6.1                                  | 4.6                                                 | 29        |
|          | 29.0       | 23.1                                   | 30.1                                                | 30.9                                               | 34.9                                                            | 25.5                                     | 34.7                                                  | 36.0                                 | 31.2                                                |           |
| 9        | 123.0      | 121.3                                  | 113.5                                               | 143.0                                              | 129.2                                                           | 120.2                                    | 118.2                                                 | 133.9                                | 118.4                                               | 31        |
|          | 18.5       | 17.0                                   | 24.9                                                | 18.1                                               | 24.1                                                            | 13.8                                     | 24.4                                                  | 30.0                                 | 25.9                                                |           |
| 10       | -9.2       | -9.4                                   | 2.5                                                 | -7.5                                               | 2.6                                                             | -6.9                                     | 6.2                                                   | 3.7                                  | 2.5                                                 | 32        |
| 11       | 33.4       | 30.7                                   | 36.5                                                | 36.9                                               | 39.9                                                            | 29.1                                     | 37.9                                                  | 42.0                                 | 36.6                                                | 33        |
| 12       | -2.9       | -17.1                                  | -4.1                                                | -18.0                                              | -6.3                                                            | -17.4                                    | -3.1                                                  | -8.4                                 | -8.3                                                | 34        |
| 13       | 3.5        | -17.7                                  | -4.6                                                | -14.9                                              | -3.7                                                            | -20.9                                    | -6.2                                                  | 2.0                                  | 1.0                                                 | 35        |
|          | 172.3      | 183.3                                  | 166.2                                               | 166.7                                              | 149.2                                                           | 180.7                                    | 171.5                                                 | 200.0                                | 177.2                                               |           |
| 14       | 65.2       | 60.6                                   | 62.0                                                | 60.2                                               | 59.6                                                            | 56.8                                     | 62.3                                                  | 72.1                                 | 63.3                                                | 30        |
| 15       | 19.0       | 15.2                                   | 23.4                                                | 14.9                                               | 21.4                                                            | 15.0                                     | 25.5                                                  | 26.5                                 | 22.8                                                | 30        |
| 16       | 44.2       | 34.1                                   | 39.4                                                | 39.6                                               | 42.2                                                            | 31.3                                     | 39.8                                                  | 47.8                                 | 41.7                                                | 36        |
|          | 109.3      | 99.2                                   | 94.8                                                | 109.5                                              | 101.1                                                           | 96.3                                     | 97.1                                                  | 114.0                                | 100.6                                               |           |

|    |       |       |       |       |       |       |       |       |       |    |
|----|-------|-------|-------|-------|-------|-------|-------|-------|-------|----|
| 17 | 50.6  | 38.0  | 42.7  | 48.1  | 49.4  | 44.1  | 51.1  | 61.8  | 54.2  | 37 |
|    | 44.6  | 26.4  | 32.9  | 30.1  | 34.2  | 26.1  | 35.3  | 41.4  | 36.0  |    |
|    | -49.9 | -58.2 | -39.0 | -60.2 | -41.8 | -61.2 | -41.7 | -48.6 | -44.1 |    |
| 18 | 38.5  | 33.6  | 39.0  | 33.5  | 37.1  | 29.5  | 38.2  | 43.8  | 38.2  | 38 |
| 19 | 55.6  | 46.2  | 49.7  | 47.8  | 49.1  | 42.8  | 50.0  | 58.2  | 51.0  | 39 |
| 20 | 33.2  | 25.1  | 31.8  | 35.5  | 38.8  | 34.6  | 42.7  | 47.0  | 41.0  | 40 |
| 21 | 36.6  | 29.4  | 35.4  | 28.1  | 32.5  | 16.6  | 26.9  | 40.0  | 34.8  | 33 |
| 22 | 83.1  | 95.2  | 91.4  | 103.2 | 95.8  | 84.5  | 86.7  | 96.0  | 84.6  | 41 |
|    | 36.5  | 14.9  | 23.1  | 20.0  | 25.7  | 13.4  | 24.1  | 31.2  | 26.9  |    |
|    | 42.6  | 37.0  | 41.9  | 41.5  | 43.8  | 34.2  | 42.4  | 49.9  | 43.6  |    |
| 23 | 92.9  | 101.9 | 97.1  | 116.4 | 106.9 | 95.8  | 96.7  | 107.0 | 94.4  | 42 |
|    | 48.3  | 44.6  | 48.4  | 49.0  | 50.1  | 40.9  | 48.3  | 56.4  | 49.4  |    |
|    | 40.1  | 29.8  | 35.8  | 30.4  | 34.5  | 24.3  | 33.7  | 40.1  | 34.9  |    |
| 24 | 74.7  | 106.5 | 101.0 | 99.6  | 92.7  | 83.4  | 85.8  | 94.5  | 83.3  | 41 |
|    | 38.0  | 23.9  | 30.8  | 30.6  | 34.6  | 23.7  | 33.1  | 37.1  | 32.2  |    |
|    | 39.0  | 36.3  | 41.3  | 36.0  | 39.2  | 20.7  | 30.5  | 40.8  | 35.5  |    |
| 25 | 99.5  | 111.5 | 105.2 | 115.4 | 106.0 | 100.1 | 100.5 | 110.1 | 97.2  | 42 |
|    | -0.2  | -1.3  | 9.3   | -0.9  | 8.1   | -4.8  | 8.0   | 10.6  | 8.6   |    |
| 26 | 39.2  | 13.6  | 22.0  | 24.1  | 29.2  | 9.5   | 20.6  | 24.9  | 21.3  | 43 |
|    | 57.3  | 50.9  | 53.7  | 62.7  | 61.7  | 48.8  | 55.3  | 65.3  | 57.3  |    |
|    | 67.7  | 87.3  | 84.6  | 91.5  | 85.9  | 77.4  | 80.5  | 88.2  | 77.7  |    |
| 27 | -5.1  | -19.9 | -6.5  | -12.2 | -1.4  | -22.7 | -7.8  | -7.1  | -7.1  | 43 |
|    | 16.7  | 16.7  | 24.6  | 23.5  | 28.7  | 14.4  | 24.9  | 30.6  | 26.4  |    |
|    | 64.8  | 90.4  | 87.3  | 95.5  | 89.3  | 81.3  | 83.9  | 91.8  | 80.9  |    |
| 28 | -29.7 | -47.6 | -30.0 | -46.8 | -30.5 | -48.8 | -30.8 | -32.5 | -29.8 | 43 |
|    | 75.0  | 94.2  | 90.5  | 99.1  | 92.3  | 84.3  | 86.5  | 94.2  | 83.0  |    |
| 29 | 43.1  | 22.9  | 29.9  | 38.6  | 41.4  | 25.7  | 34.9  | 43.2  | 37.6  | 43 |
|    | 73.9  | 85.2  | 82.9  | 96.5  | 90.1  | 80.3  | 83.0  | 90.3  | 79.5  |    |
| 30 | 0.5   | -8.9  | 2.9   | -4.7  | 4.9   | -11.0 | 2.6   | 4.6   | 3.3   | 43 |
|    | 70.5  | 89.7  | 86.7  | 94.9  | 88.8  | 80.6  | 83.3  | 91.2  | 80.3  |    |
| 31 | -32.4 | -58.7 | -39.4 | -56.2 | -38.4 | -60.4 | -41.0 | -45.8 | -41.6 | 43 |
|    | 104.5 | 114.7 | 107.9 | 115.8 | 106.4 | 106.6 | 106.2 | 117.5 | 103.8 |    |
| 32 | 54.9  | 66.9  | 67.3  | 64.9  | 63.5  | 62.7  | 67.5  | 78.4  | 69.0  | 43 |
|    | 103.0 | 112.7 | 106.2 | 117.1 | 107.4 | 108.2 | 107.6 | 118.8 | 104.9 |    |
| 33 | 4.2   | 10.7  | 19.5  | 11.5  | 18.6  | 8.1   | 19.4  | 24.1  | 20.6  | 43 |
|    | 100.3 | 113.0 | 106.5 | 113.7 | 104.6 | 105.2 | 105.0 | 116.1 | 102.5 |    |
| 34 | 49.7  | 53.1  | 55.6  | 38.2  | 41.0  | 48.3  | 54.8  | 62.2  | 54.5  | 44 |

|                          |       |               |               |               |               |               |               |               |               |    |
|--------------------------|-------|---------------|---------------|---------------|---------------|---------------|---------------|---------------|---------------|----|
|                          | -12.8 | -26.1         | -11.7         | -23.6         | -11.0         | -28.7         | -13.0         | -13.6         | -12.9         |    |
| <b>35</b>                | 123.7 | 121.0         | 113.3         | 106.8         | 98.8          | 115.8         | 114.3         | 128.4         | 113.5         | 45 |
|                          | 21.4  | 9.0           | 18.1          | 9.8           | 17.1          | 7.3           | 18.7          | 22.9          | 19.6          |    |
| <b>36</b>                | 50.5  | 49.0          | 52.1          | 35.6          | 38.9          | 45.1          | 52.0          | 57.4          | 50.3          | 46 |
|                          | 22.7  | 12.4          | 21.0          | 13.6          | 20.3          | 10.7          | 21.7          | 25.1          | 21.5          |    |
| <b>37</b>                | 32.0  | 22.1          | 29.2          | 9.3           | 16.7          | 17.3          | 27.5          | 30.7          | 26.5          | 47 |
|                          | 24.8  | 15.2          | 23.4          | 15.9          | 22.3          | 13.7          | 24.3          | 29.3          | 25.3          |    |
| <b>38</b>                | 34.3  | 20.5          | 27.9          | 31.5          | 35.4          | 20.4          | 30.2          | 34.6          | 30.0          | 47 |
|                          | 41.0  | 25.9          | 32.5          | 27.3          | 31.9          | 23.1          | 32.6          | 39.2          | 34.1          |    |
| <b>39</b>                | 1.7   | -4.0          | 7.1           | -24.5         | -11.7         | 1.5           | 13.6          | 14.4          | 12.0          | 47 |
|                          | 52.1  | 33.4          | 38.8          | 36.6          | 39.7          | 32.1          | 40.5          | 47.9          | 41.8          |    |
| <b><math>R^2</math></b>  |       | <b>0.9535</b> | <b>0.9535</b> | <b>0.9447</b> | <b>0.9447</b> | <b>0.9627</b> | <b>0.9627</b> | <b>0.9720</b> | <b>0.9720</b> |    |
| <b><math>RMSE</math></b> |       | <b>13.8</b>   | <b>8.9</b>    | <b>14.2</b>   | <b>9.8</b>    | <b>13.6</b>   | <b>8.0</b>    | <b>10.8</b>   | <b>6.9</b>    |    |

<sup>a</sup> corrected by using the factors for empirical linear scaling obtained by the linear regression procedure for the title Pd-complexes.



**Table S2.** Empirical scaling factors obtained by the linear regression analysis of calculated and experimental  $\delta^{31}\text{P}$  for the title Pd-complexes.

| Level of theory                                | $R^2$ | Slope  | Intercept | $RMSE$ |
|------------------------------------------------|-------|--------|-----------|--------|
| PBE0/6-311G(2d,2p)//PBE0/6-31+G(d)             | 0.954 | 1.1766 | -12.297   | 8.9    |
| PBE0/6-311G(2d,2p) (PCM)//PBE0/6-31+G(d) (PCM) | 0.945 | 1.1881 | -10.561   | 9.8    |
| PBE0/6-311G(2d,2p)//PBE0/6-311+G(2d)           | 0.963 | 1.1346 | -13.8962  | 8.0    |
| PBE0/def2-TZVP//PBE0/6-311+G(2d)               | 0.972 | 0.9297 | 1.1235    | 6.9    |

**Table S3.** Triplet-singlet states energy gap (UPBE0/6-31+G(d)) for the "training" set of Pd complexes (**2**, **9**, **17**, **22-23**, **26**, **28-30**, **32**, **38**).

| Compound  | E, kcal/mol    |
|-----------|----------------|
| <b>38</b> | 38.9           |
| <b>9</b>  | 38.9           |
| <b>17</b> | 46.6           |
| <b>2</b>  | 51.7           |
| <b>22</b> | 46.1           |
| <b>23</b> | 44.9           |
| <b>26</b> | 40.9           |
| <b>28</b> | - <sup>a</sup> |
| <b>29</b> | 35.8           |
| <b>30</b> | 35.6           |
| <b>32</b> | 67.6           |

<sup>a</sup> triplet state does not correspond to energy minima.

**Table S4.** Experimental and calculated (by different combinations) <sup>31</sup>P NMR shifts (ppm) for the "training" set of Pd complexes (**2**, **9**, **17**, **22-23**, **26**, **28-30**, **32**, **38**).

|           |                   | Calculated                   |                               |                               |                                |                                 |                                 |                                                             |                                                  |                                                       |                           |                        |                             |                            |                       |                          |                            |                            |                         |                              |              |                        |                      |
|-----------|-------------------|------------------------------|-------------------------------|-------------------------------|--------------------------------|---------------------------------|---------------------------------|-------------------------------------------------------------|--------------------------------------------------|-------------------------------------------------------|---------------------------|------------------------|-----------------------------|----------------------------|-----------------------|--------------------------|----------------------------|----------------------------|-------------------------|------------------------------|--------------|------------------------|----------------------|
|           |                   | Combination                  |                               |                               |                                |                                 |                                 |                                                             |                                                  |                                                       |                           |                        |                             |                            |                       |                          |                            |                            |                         |                              |              |                        |                      |
| Compound  | Experimental      | 6-311G(2d,2p)//<br>6-31+G(d) | 6-311G(2d,2p)//<br>6-31+G(2d) | 6-311G(2d,2p)//<br>6-311+G(d) | 6-311G(2d,2p)//<br>6-311+G(2d) | 6-311+G(2d,2p)//<br>6-311+G(2d) | 6-311G(2d,2p)//<br>6-311+G(3df) | 6-311G(2d,2p)//6-311+G(2d)<br>Pd - def2-TZVPPD//def2-TZVPPD | 6-311G(2d,2p)//6-311+G(2d)<br>Pd - SDD//DKH3-DZP | 6-311G(2d,2p)//6-311+G(2d)<br>Pd - DKH3-DZP//DKH3-DZP | cc-pVTZ//<br>6-311+G(3df) | pc-2//<br>6-311+G(3df) | def2-TZVP//<br>6-311+G(3df) | def2-TZVP//<br>6-311+G(2d) | TZV//<br>6-311+G(3df) | def2-TZVP//<br>def2-TZVP | 6-311G(2d,2p)//<br>cc-pVDZ | 6-311G(2d,2p)//<br>cc-pVTZ | 6-311G(2d,2p)//<br>pc-2 | 6-311G(2d,2p)//<br>def2-TZVP | TZV//<br>TZV | cc-pVTZ//<br>6-31+G(d) | cc-pVTZ//<br>cc-pVDZ |
| <b>2</b>  | 31.5              | 15.0                         | 22.3                          | 25.8                          | 12.0                           | 21.8                            | 25.3                            | 14.8                                                        | 1.3                                              | -4.0                                                  | 13.7                      | 27.2                   | 31.3                        | 28.1                       | -37.8                 | 30.3                     | 12.4                       | 22.2                       | 25.0                    | 24.2                         | -58.2        | 3.2                    | -3.9                 |
| <b>9</b>  | 123.0             | 121.3                        | 129.4                         | 133.5                         | 120.2                          | 131.8                           | 132.0                           | 124.6                                                       | 111.7                                            | 112.3                                                 | 123.1                     | 131.9                  | 135.2                       | 133.9                      | 75.4                  | 133.8                    | 119.2                      | 128.9                      | 138.0                   | 130.5                        | 68.9         | 112.5                  | 109.0                |
|           | 18.5              | 17.0                         | 24.3                          | 27.8                          | 13.8                           | 24.0                            | 25.8                            | 17.6                                                        | 22.8                                             | 21.7                                                  | 7.4                       | 33.4                   | 31.9                        | 30.0                       | -46.8                 | 31.0                     | 14.4                       | 23.5                       | 25.4                    | 24.9                         | -66.4        | -1.5                   | -6.9                 |
| <b>17</b> | 50.6              | 38.0                         | 53.4                          | 57.8                          | 44.1                           | 56.2                            | 56.4                            | 47.9                                                        | 49.1                                             | 47.2                                                  | 37.3                      | 64.2                   | 64.2                        | 61.8                       | -8.9                  | 62.9                     | 44.7                       | 54.2                       | 55.8                    | 55.2                         | -32.8        | 28.5                   | 22.6                 |
|           | 44.6              | 26.4                         | 35.4                          | 39.8                          | 26.1                           | 36.7                            | 38.4                            | 29.3                                                        | 28.2                                             | 27.9                                                  | 27.5                      | 41.3                   | 43.7                        | 41.4                       | -33.9                 | 42.6                     | 25.7                       | 35.8                       | 37.7                    | 37.3                         | -58.0        | 17.6                   | 10.8                 |
|           | -49.9             | -58.2                        | -52.0                         | -47.3                         | -61.2                          | -51.7                           | -49.0                           | -57.6                                                       | -62.8                                            | -68.3                                                 | -52.2                     | -44.7                  | -46.6                       | -48.6                      | -122.8                | -48.6                    | -63.6                      | -53.6                      | -50.1                   | -51.0                        | -150.8       | -64.2                  | -71.3                |
| <b>38</b> | 34.3              | 20.5                         | 31.5                          | 34.4                          | 20.4                           | 33.0                            | 24.8                            | 25.2                                                        | 49.0                                             | 92.4                                                  | 23.0                      | 28.0                   | 28.5                        | 34.6                       | -33.4                 | 28.7                     | 22.6                       | 25.9                       | 27.0                    | 24.6                         | 52.4         | 11.4                   | 15.7                 |
|           | 41.0              | 25.9                         | 32.0                          | 36.6                          | 23.1                           | 34.8                            | 35.9                            | 26.3                                                        | 17.8                                             | 13.4                                                  | 26.0                      | 39.1                   | 41.9                        | 39.2                       | -0.8                  | 40.9                     | 23.3                       | 33.5                       | 35.2                    | 34.6                         | -55.4        | 38.7                   | 8.5                  |
| <b>22</b> | 83.1 <sup>a</sup> | 95.2                         | 96.7                          | 104.4                         | 84.5                           | 94.4                            | 93.7                            | 88.9                                                        | 90.0                                             | 93.2                                                  | 85.4                      | 92.2                   | 95.0                        | 96.0                       | 76.7                  | 94.6                     | 104.7                      | 95.9                       | 94.3                    | 93.4                         | 119.8        | 85.6                   | 89.1                 |
|           | 36.5              | 14.9                         | 23.0                          | 26.2                          | 13.4                           | 25.6                            | 26.3                            | 16.8                                                        | 12.0                                             | 9.5                                                   | 13.4                      | 28.1                   | 34.1                        | 31.2                       | -39.5                 | 32.8                     | 12.3                       | 23.3                       | 25.3                    | 24.9                         | -40.2        | 2.5                    | -3.9                 |
|           | 42.6              | 37.0                         | 43.6                          | 48.4                          | 34.2                           | 46.0                            | 46.6                            | 37.9                                                        | 34.3                                             | 32.0                                                  | 34.3                      | 49.4                   | 52.3                        | 49.9                       | -19.9                 | 51.3                     | 36.1                       | 44.5                       | 46.0                    | 45.5                         | -66.0        | 25.1                   | 19.9                 |
| <b>23</b> | 92.9              | 101.9                        | 106.3                         | 117.4                         | 95.8                           | 106.9                           | 104.5                           | 99.5                                                        | 100.6                                            | 105.6                                                 | 96.8                      | 120.5                  | 105.9                       | 107.0                      | 94.7                  | 104.4                    | 119.4                      | 106.6                      | 100.9                   | 102.9                        | 150.3        | 98.1                   | 104.5                |
|           | 48.3              | 44.6                         | 50.6                          | 55.2                          | 40.9                           | 52.9                            | 53.2                            | 44.4                                                        | 38.5                                             | 21.9                                                  | 41.9                      | 72.9                   | 58.7                        | 56.4                       | -16.5                 | 58.3                     | 42.1                       | 51.3                       | 50.0                    | 52.3                         | -37.7        | 33.3                   | 29.1                 |
|           | 40.1              | 29.8                         | 32.4                          | 38.0                          | 24.3                           | 34.1                            | 36.4                            | 27.6                                                        | 23.0                                             | 35.6                                                  | 24.6                      | 55.6                   | 42.1                        | 40.1                       | -32.7                 | 40.6                     | 23.4                       | 33.7                       | 32.5                    | 34.7                         | -52.6        | 14.6                   | 6.4                  |
| <b>26</b> | 39.2              | 13.6                         | 20.2                          | 23.6                          | 9.5                            | 21.3                            | 21.1                            | 13.1                                                        | 11.8                                             | 12.2                                                  | 10.8                      | 21.5                   | 26.4                        | 24.9                       | -45.8                 | 26.3                     | 13.4                       | 20.7                       | 21.7                    | 20.6                         | -53.9        | 1.4                    | -5.0                 |
|           | 57.3              | 50.9                         | 58.2                          | 63.0                          | 48.8                           | 59.9                            | 60.9                            | 53.1                                                        | 51.0                                             | 47.1                                                  | 47.2                      | 62.3                   | 67.3                        | 65.3                       | -14.4                 | 66.3                     | 47.8                       | 58.4                       | 60.2                    | 59.8                         | -36.3        | 38.2                   | 31.3                 |
|           | 67.7              | 87.3                         | 89.6                          | 95.6                          | 77.4                           | 87.0                            | 86.1                            | 81.4                                                        | 83.0                                             | 85.4                                                  | 78.1                      | 85.5                   | 87.1                        | 88.2                       | 77.1                  | 87.4                     | 96.2                       | 89.1                       | 87.5                    | 86.4                         | 115.0        | 79.1                   | 82.6                 |
| <b>28</b> | -29.7             | -47.6                        | -38.5                         | -35.9                         | -48.8                          | -36.6                           | -36.7                           | -45.1                                                       | -41.6                                            | -50.4                                                 | -45.8                     | -34.2                  | -30.7                       | -32.5                      | -101.8                | -31.6                    | -54.3                      | -40.2                      | -37.7                   | -37.9                        | -133.1       | -55.1                  | -64.8                |
|           | 75.0              | 94.2                         | 95.3                          | 103.2                         | 84.3                           | 93.5                            | 93.2                            | 88.7                                                        | 88.5                                             | 90.6                                                  | 84.9                      | 91.9                   | 93.7                        | 94.2                       | 80.8                  | 93.6                     | 106.0                      | 95.5                       | 93.9                    | 93.0                         | 117.4        | 85.2                   | 92.1                 |
| <b>29</b> | 43.1              | 22.9                         | 35.3                          | 39.4                          | 25.7                           | 38.4                            | 37.9                            | 29.0                                                        | 20.5                                             | 11.5                                                  | 21.8                      | 43.0                   | 45.6                        | 43.2                       | -25.1                 | 39.8                     | 25.3                       | 34.7                       | 36.4                    | 34.1                         | -48.7        | 15.6                   | 8.1                  |

|           |                         |               |               |               |               |               |               |               |               |                         |               |               |               |               |               |               |               |               |               |               |                           |               |               |
|-----------|-------------------------|---------------|---------------|---------------|---------------|---------------|---------------|---------------|---------------|-------------------------|---------------|---------------|---------------|---------------|---------------|---------------|---------------|---------------|---------------|---------------|---------------------------|---------------|---------------|
|           | <b>73.9</b>             | 85.2          | 91.8          | 99.0          | 80.3          | 89.8          | 89.4          | 84.5          | 85.9          | 87.5                    | 81.1          | 87.5          | 89.6          | 90.3          | 75.6          | 90.3          | 103.9         | 91.5          | 90.1          | 89.9          | 120.6                     | 80.8          | 87.8          |
| <b>30</b> | <b>0.5</b>              | -8.9          | -1.9          | 2.3           | -11.0         | -0.1          | 0.4           | -7.8          | -7.6          | -11.5                   | -13.6         | 5.6           | 6.5           | 4.6           | -67.3         | 5.5           | -12.1         | -2.3          | 0.0           | -0.8          | -94.8                     | -22.8         | -30.0         |
|           | <b>70.5</b>             | 89.7          | 92.1          | 99.8          | 80.6          | 91.8          | 89.9          | 85.2          | 86.8          | 87.1                    | 81.5          | 88.7          | 90.3          | 91.2          | 80.6          | 90.3          | 98.9          | 92.2          | 90.7          | 89.9          | 120.3                     | 81.1          | 84.4          |
| <b>32</b> | <b>54.9</b>             | 66.9          | 72.1          | 77.1          | 62.7          | 72.9          | 73.9          | 66.5          | 74.0          | 78.3                    | 58.8          | 77.7          | 79.6          | 78.4          | 8.3           | 78.7          | 65.6          | 73.0          | 73.9          | 73.0          | -4.7                      | 51.8          | 47.0          |
|           | <b>103.0</b>            | 112.7         | 119.1         | 124.5         | 108.2         | 118.9         | 116.4         | 112.1         | 115.0         | 116.3                   | 103.9         | 113.6         | 117.0         | 118.8         | 89.4          | 116.5         | 124.0         | 117.7         | 116.6         | 115.9         | 112.4                     | 102.7         | 105.4         |
|           | <b><math>R^2</math></b> | <b>0.9359</b> | <b>0.9512</b> | <b>0.9439</b> | <b>0.9547</b> | <b>0.9593</b> | <b>0.9586</b> | <b>0.9530</b> | <b>0.9042</b> | <b>0.8287</b>           | <b>0.9498</b> | <b>0.9428</b> | <b>0.9654</b> | <b>0.9644</b> | <b>0.8333</b> | <b>0.9638</b> | <b>0.9113</b> | <b>0.9529</b> | <b>0.9582</b> | <b>0.9564</b> | <b>0.6889</b>             | <b>0.9271</b> | <b>0.9011</b> |
|           | $\Delta\delta^b$        | 24            | 19            | 22            | 18            | 18            | 14            | 19            | 20            | 28<br>(65) <sup>c</sup> | 15            | 19            | 9             | 13            | 68            | 11            | 36            | 17            | 11            | 15            | 118<br>(101) <sup>d</sup> | 22            | 37            |

<sup>a</sup> <sup>31</sup>P NMR shifts of P=O phosphorus atoms colored in red; <sup>b</sup> average deviation (ppm) from the general correlation line for P=O phosphorus atoms; <sup>c</sup> in brackets average deviation from the general correlation line for P=P phosphorus atoms.

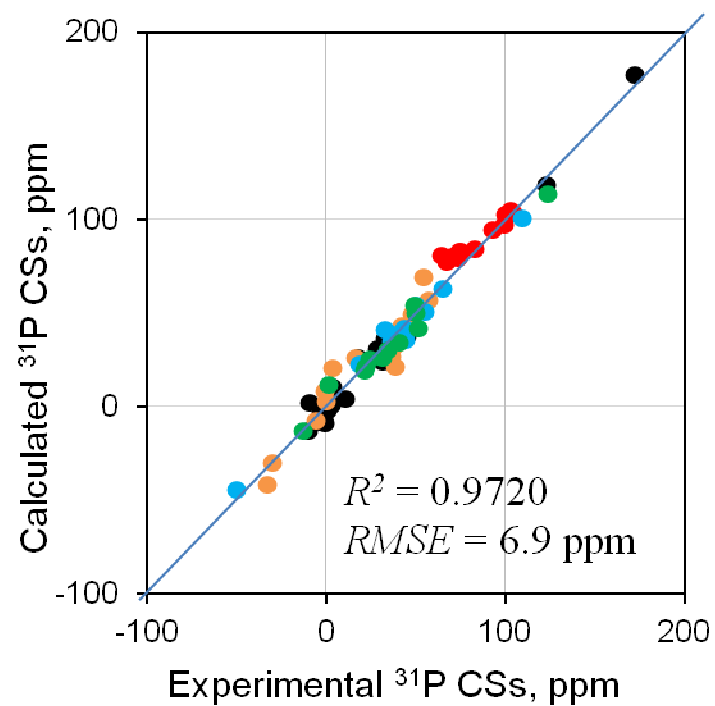

**Figure S5.** Correlation of calculated (PBE0/{def2-TZVP; Pd(SDD)}/{PBE0/{6-311+G(2d); Pd(SDD)}}, scaled) vs experimental  $^{31}\text{P}$  CSs for palladium complexes **1-39**. Complexes based on  $\sigma$ -donor ligands (●), charged palladium complexes based on  $\sigma$ -donor ligands (●), complexes containing P=O groups (● are the P = O phosphorus, ● are other phosphorus atoms in this type of complexes) and complexes based on  $\pi$ -donor ligands (●).

## REFERENCES

- [1] Kohn, W.; Sham, L. J. Self-consistent equations including exchange and correlation effects. *Phys. Rev.*, **1965**, *140*, A1133.
- [2] Frisch, M. J.; Trucks, G. W.; Schlegel, H. B.; Scuseria, G. E.; Robb, M. A.; Cheeseman, J. R.; Montgomery, J. A., Jr.; Vreven, T.; Kudin, K. N.; Burant, J. C.; Millam, J. M.; Iyengar, S. S.; Tomasi, J.; Barone, V.; Mennucci, B.; Cossi, M.; Scalmani, G.; Rega, N.; Petersson, G. A.; Nakatsuji, H.; Hada, M.; Ehara, M.; Toyota, K.; Fukuda, R.; Hasegawa, J.; Ishida, M.; Nakajima, T.; Honda, Y.; Kitao, O.; Nakai, H.; Klene, M.; Li, X.; Knox, J. E.; Hratchian, H. P.; Cross, J. B.; Adamo, C.; Jaramillo, J.; Gomperts, R.; Stratmann, R. E.; Yazyev, O.; Austin, A. J.; Cammi, R.; Pomelli, C.; Ochterski, J. W.; Ayala, P. Y.; Morokuma, K.; Voth, G. A.; Salvador, P.; Dannenberg, J. J.; Zakrzewski, V. G.; Dapprich, S.; Daniels, A. D.; Strain, M. C.; Farkas, O.; Malick, D. K.; Rabuck, A. D.; Raghavachari, K.; Foresman, J. B.; Ortiz, J. V.; Cui, Q.; Baboul, A. G.; Clifford, S.; Cioslowski, J.; Stefanov, B. B.; Liu, G.; Liashenko, A.; Piskorz, P.; Komaromi, I.; Martin, R. L.; Fox, D. J.; Keith, T.; Al-Laham, M. A.; Peng, C. Y.; Nanayakkara, A.; Challacombe, M.; Gill, P. M. W.; Johnson, B.; Chen, W.; Wong, M. W.; Gonzalez, C.; Pople, J. A. *Gaussian 03, Revision B.04*; Gaussian, Inc., Pittsburgh, PA.
- [3] Frisch, M. J.; Trucks, G. W.; Schlegel, H. B.; Scuseria, G. E.; Robb, M. A.; Cheeseman, J. R.; Scalmani, G.; Barone, V.; Petersson, G. A.; Nakatsuji, H.; Li, X.; Caricato, M.; Marenich, A. V.; Bloino, J.; Janesko, B. G.; Gomperts, R.; Mennucci, B.; Hratchian, H. P.; Ortiz, J. V.; Izmaylov, A. F.; Sonnenberg, J. L.; Williams-Young, D.; Ding, F.; Lipparini, F.; Egidi, F.; Goings, J.; Peng, B.; Petrone, A.; Henderson, T.; Ranasinghe, D.; Zakrzewski, V. G.; Gao, J.; Rega, N.; Zheng, G.; Liang, W.; Hada, M.; Ehara, M.; Toyota, K.; Fukuda, R.; Hasegawa, J.; Ishida, M.; Nakajima, T.; Honda, Y.; Kitao, O.; Nakai, H.; Vreven, T.; Throssell, K.; Montgomery, J. A.; Peralta, Jr., J. E.; Ogliaro, F.; Bearpark, M. J.; Heyd, J. J.; Brothers, E. N.; Kudin, K. N.; Staroverov, V. N.; Keith, T. A.; Kobayashi, R.; Normand, J.; Raghavachari, K.; Rendell, A. P.; Burant, J. C.; Iyengar, S. S.; Tomasi, J.; Cossi, M.; Millam, J. M.; Klene, M.; Adamo, C.; Cammi, R.; Ochterski, J. W.; Martin, R. L.; Morokuma, K.; Farkas, O.; Foresman, J. B.; Fox, D. J. *Gaussian 16, Revision A.03*; Gaussian, Inc., Wallingford CT.
- [4] Adamo, C.; Barone, V. Toward reliable density functional methods without adjustable parameters: The PBE0 model. *J. Chem. Phys.* **1999**, *110*, 6158–6170.
- [5] Hehre, W. J.; Ditchfield, R.; Pople, J. A. Self-Consistent Molecular Orbital Methods. XII. Further Extensions of Gaussian-Type Basis Sets for Use in Molecular Orbital Studies of Organic Molecules. *J. Chem. Phys.* **1972**, *56*, 2257–2261.
- [6] Clark, T.; Chandrasekhar, J.; Spitznagel, G. W.; Schleyer, P. V. R. Efficient diffuse function-augmented basis sets for anion calculations. III. The 3-21+G basis set for first-row elements, Li-F. *J. Comput. Chem.* **1983**, *4*, 294–301.
- [7] Francel, M. M.; Pietro, W. J.; Hehre, W. J.; Binkley, J. S.; Gordon, M. S.; DeFrees, D. J.; Pople, J. A. Self-consistent molecular orbital methods. XXIII. A polarization-type basis set for second-row elements. *J. Chem. Phys.* **1982**, *77*, 3654–3665.
- [8] Frisch, M. J.; Pople, J. A.; Binkley, J. S. Self-consistent molecular orbital methods 25. Supplementary functions for Gaussian basis sets. *J. Chem. Phys.* **1984**, *80*, 3265–3269.
- [9] Krishnan, R.; Binkley, J. S.; Seeger, R.; Pople, J. A. Self-consistent molecular orbital methods. XX. A basis set for correlated wave functions. *J. Chem. Phys.* **1980**, *72*, 650–654.
- [10] McLean, A. D.; Chandler, G. S. Contracted Gaussian basis sets for molecular calculations. I. Second row atoms,  $Z = 11-18$ . *J. Chem. Phys.* **1980**, *72*, 5639–5648.

- [11] Spitznagel, G. W.; Clark, T.; von Ragué Schleyer, P.; Hehre, W. J. An evaluation of the performance of diffuse function-augmented basis sets for second row elements, Na-Cl. *J. Comput. Chem.* **1987**, *8*, 1109–1116.
- [12] Ditchfield, R.; Hehre, W. J.; Pople, J. A. Self-Consistent Molecular-Orbital Methods. IX. An Extended Gaussian-Type Basis for Molecular-Orbital Studies of Organic Molecules. *J. Chem. Phys.* **1971**, *54*, 724–728.
- [13] Schaefer, A.; Horn, H.; Ahlrichs, R. Fully optimized contracted Gaussian-basis sets for atoms Li to Kr. *J. Chem. Phys.* **1992**, *97*, 2571–2577.
- [14] Schaefer, A.; Huber, C.; Ahlrichs, R. Fully optimized contracted Gaussian-basis sets of triple zeta valence quality for atoms Li to Kr. *J. Chem. Phys.* **1994**, *100*, 5829–5835.
- [15] Weigend, F.; Ahlrichs, R. Balanced basis sets of split valence, triple zeta valence and quadruple zeta valence quality for H to Rn: Design and assessment of accuracy. *Phys. Chem. Chem. Phys.* **2005**, *7*, 3297–3305.
- [16] Dunning, T. H., Jr. Gaussian basis sets for use in correlated molecular calculations. I. The atoms boron through neon and hydrogen. *J. Chem. Phys.* **1989**, *90*, 1007–1023.
- [17] Woon, D. E.; Dunning, T. H. Gaussian basis sets for use in correlated molecular calculations. III. The atoms aluminum through argon. *J. Chem. Phys.* **1993**, *98*, 1358–1371.
- [18] Jensen, F. Polarization consistent basis sets: Principles. *J. Chem. Phys.* **2001**, *115*, 9113–9125.
- [19] Jensen, F. Polarization consistent basis sets. II. Estimating the Kohn-Sham basis set limit. *J. Chem. Phys.* **2002**, *116*, 7372–7379.
- [20] Jensen, F.; Helgaker, T. Polarization consistent basis sets. V. The elements Si-Cl. *J. Chem. Phys.* **2004**, *121*, 3463–3470.
- [21] Andrae, D.; Haeussermann, U.; Dolg, M.; Stoll, H.; Preuss, H. Energy-adjusted *ab initio* pseudopotentials for the second and third row transition elements. *Theor. Chem. Acc.* **1990**, *77*, 123–141.
- [22] Noro, T.; Sekiya, M.; Koga, T.; Saito, S. L. Relativistic contracted Gaussian-type basis functions for atoms K through Xe. *Chem. Phys. Lett.* **2009**, *481*, 229–233.
- [23] Osanai, Y. O. U.; Sekiya, M.; Noro, T.; Koga, T. Valence and correlating basis sets for the second transition-metal atoms from Y to Cd. *Mol. Phys.* **2003**, *101*, 65–71.
- [24] Andrae, D.; Häußermann, U.; Dolg, M.; Stoll, H.; Preuß, H. Energy-adjusted *ab initio* pseudopotentials for the second and third row transition elements. *Theor. Chim. Acta.* **1990**, *77*, 123–141.
- [25] Weigend, F.; Ahlrichs, R. Balanced basis sets of split valence, triple zeta valence and quadruple zeta valence quality for H to Rn: Design and assessment of accuracy. *Phys. Chem. Chem. Phys.* **2005**, *7*, 3297–3305.

- [26] Miertus, S.; Scrocco, E.; Tomasi, J. Electrostatic interaction of a solute with a continuum. A direct utilization of AB initio molecular potentials for the prevision of solvent effects. *Chem. Phys.* **1981**, *55*, 117–129.
- [27] Hansen, A.E.; Bouman, T.D. Localized orbital/local origin method for calculation and analysis of NMR shieldings. Applications to  $^{13}\text{C}$  shielding tensors. *J. Chem. Phys.* **1985**, *82*, 5035–5047.
- [28] Pritchard, B. P.; Altarawy, D.; Didier, B.; Gibson, T. D.; Windus, T. L. A New Basis Set Exchange: An Open, Up-to-date Resource for the Molecular Sciences Community. *J. Chem. Inf. Model.* **2019**, *59*, 4814–4820.
- [29] Portnoy, M.; Milstein, D. Chelate effect on the structure and reactivity of electron-rich palladium complexes and its relevance to catalysis. *Organometallics*. **1993**, *12*, 1655–1664.
- [30] Raebiger, J. W.; Miedaner, A.; Curtis, C. J.; Miller, S. M.; Anderson, O. P.; DuBois, D. L. Using ligand bite angles to control the hydricity of palladium diphosphine complexes. *J. Am. Chem. Soc.* **2004**, *126*, 5502–5514.
- [31] Nixon, J. F.; Sillett, G. J.  $^{31}\text{P}$  and  $^{195}\text{Pt}$  NMR studies on fluxional  $\eta^1$ -ligated 1,2,4-triphosphacyclopentadienyl palladium(II) and platinum(II) complexes. *J. Organomet. Chem.* **1993**, *461*, 237–245.
- [32] Kane, J. C.; Wong, E. H.; Yap, G. P.; Rheingold, A. L. Synthesis and structural studies of molybdenum and palladium complexes of 1,5-diaza-3,7-diphosphacyclooctane ligands. *Polyhedron*. **1999**, *18*, 1183–1188.
- [33] Gouygou, M.; Tissot, O.; Daran, J. C.; Balavoine, G. G. Biphosphole: A  $C_2$  Symmetry Chiral Bidentate Ligand. Synthesis and Characterization Of Nickel, Palladium, Platinum, and Rhodium Complexes. *Organometallics*. **1997**, *16*, 1008–1015.
- [34] Wächtler, E.; Priver, S. H.; Wagler, J.; Heine, T.; Zhechkov, L.; Bennett, M. A.; Bhargava, S. K. Metallophilic contacts in 2- $\text{C}_6\text{F}_4\text{PPh}_2$  bridged heterobinuclear complexes: a crystallographic and computational study. *Inorg. Chem.* **2015**, *54*, 6947–6957.
- [35] David, M. A.; Wicht, D. K.; Glueck, D. S.; Yap, G. P.; Liable-Sands, L. M.; Rheingold, A. L. Palladium-catalyzed phosphaketene decarbonylation: diphosphaureylene intermediates in diphosphene formation. *Organometallics*. **1997**, *16*, 4768–4770.
- [36] Sevillano, P.; Habtemariam, A.; Parsons, S.; Castiñeiras, A.; García, M. E.; Sadler, P. J. Gold (I)-induced chelate ring-opening of palladium (II) and platinum (II) triphos complexes. *J. Chem. Soc., Dalton Trans.* **1999**, *16*, 2861–2870.
- [37] Zhuravel, M. A.; Grewal, N. S.; Glueck, D. S.; Lam, K. C.; Rheingold, A. L. Cyclometalation of Dimesitylphosphine in Cationic Palladium (II) and Platinum (II) Complexes: P–H vs C–H Activation. *Organometallics*. **2000**, *19*, 2882–2890.
- [38] Mizuta, T.; Okano, A.; Sasaki, T.; Nakazawa, H.; Miyoshi, K. Palladium (II) and platinum (II) complexes of a tetraphosphamacrocyclic. X-ray crystal structures of phosphorus analogs of a (tetramethylcyclam) metal complex. *Inorg. Chem.* **1997**, *36*, 200–203.
- [39] Mason, L. J.; Perrault, E. M.; Miller, S. M.; Helm, M. L. Group 10 metal complexes of a cyclic diphosphine: The crystal structures of bis (cis-P,P'-diphenyl-1,4-diphospha-cyclohexane)M(II)chloride, M= palladium, platinum. *Inorg. Chem. Com.* **2006**, *9*, 946–948.



- [40] Melaimi, M.; Thoumazet, C.; Ricard, L.; Le Floch, P. Syntheses of a 2,6-bis-(methylphospholyl) pyridine ligand and its cationic Pd(II) and Ni(II) complexes – application in the palladium-catalyzed synthesis of arylboronic esters. *J. Organomet. Chem.* **2004**, *689*, 2988–2994.
- [41] Kohler, M. C.; Grimes, T. V.; Wang, X.; Cundari, T. R.; Stockland Jr, R. A. Arylpalladium phosphonate complexes as reactive intermediates in phosphorus – carbon bond forming reactions. *Organometallics*. **2009**, *28*, 1193–1201.
- [42] Stockland, R. A.; Levine, A. M.; Giovine, M. T.; Guzei, I. A.; Cannistra, J. C. Reductive elimination from metal phosphonate complexes: Circumvention of competing protonolysis reactions. *Organometallics*. **2004**, *23*, 647–656.
- [43] Stockland Jr, R. A.; Maher, D. L.; Anderson, G. K.; Rath, N. P. Demethylation of trimethylphosphite promoted by dichlorodiphosphineplatinum and palladium complexes. Structures of the metallophosphonate complexes [Pt(PAP){P(O)(OMe)<sub>2</sub>}<sub>2</sub>](PAP= dppe, dppp). *Polyhedron*. **1999**, *18*, 1067–1075.
- [44] Gómez-Ruiz, S.; Hey-Hawkins, E. Oxidative cleavage of tetraaryltetraphosphane-1, 4-diides by nickel (ii) and palladium (ii): formation of unusual Ni<sup>0</sup> and Pd<sup>0</sup> diaryldiphosphene complexes. *Dalton Trans.* **2007**, *48*, 5678–5683.
- [45] Fenske, D.; Schottmueller, H. New Research of Reaction Behaviour of Triorganylcyclotriphosphines. The Crystal Structures of [(PPh<sub>3</sub>)<sub>2</sub>Pt(P<sup>t</sup>Bu)<sub>3</sub>], [(PPh<sub>3</sub>)<sub>2</sub>Pd(P<sup>t</sup>Bu)<sub>2</sub>], [(CO)<sub>4</sub>Cr{(P<sup>i</sup>Pr)<sub>3</sub>}<sub>2</sub>], [RhCl(PPh<sub>3</sub>)(P<sup>t</sup>Bu)<sub>3</sub>], [(NiCO)<sub>6</sub>(μ<sub>2</sub>-CO)<sub>3</sub>{(P<sup>t</sup>Bu)<sub>2</sub>}<sub>2</sub>], and [(CpFeCO)<sub>2</sub>(μ-CO)(μ-PH<sup>t</sup>Bu)]<sup>+</sup>·[FeCl<sub>3</sub>(thf)]<sup>-</sup>. *Z. anorg. allg. Chem.* **1998**, *624*, 443–451.
- [46] Phillips, I. G.; Ball, R. G.; Cavell, R. G. Reactions of perfluoromethyl-substituted cyclopolyphosphines with zerovalent group 10 metal complexes. Crystal and molecular structure of a complex with a coordinated diphosphene, [Pd(η<sup>2</sup>-CF<sub>3</sub>P=PCF<sub>3</sub>)(PPh<sub>3</sub>)<sub>2</sub>]. *Inorg. Chem.* **1992**, *31*, 1633–1641.
- [47] Chatt, J.; Hitchcock, P. B.; Pidcock, A.; Warrens, C. P.; Dixon, K. R. The nature of the co-ordinate link. Part 11. Synthesis and phosphorus-31 nuclear magnetic resonance spectroscopy of platinum and palladium complexes containing side-bonded (*E*)-diphenyldiphosphene. X-Ray crystal and molecular structures of [Pd{(E)-PhP=PPh}(Ph<sub>2</sub>PCH<sub>2</sub>CH<sub>2</sub>PPh<sub>2</sub>)] and [Pd{[(E)-PhP=PPh][W(CO)<sub>5</sub>]}<sub>2</sub>}(Ph<sub>2</sub>PCH<sub>2</sub>CH<sub>2</sub>PPh<sub>2</sub>)]. *J. Chem. Soc., Dalton Trans.* **1984**, *10*, 2237–2244.
